# Supplementary material for: A framework for exploring associations between biomedical terms in PubMed
Source: PubMed Central journal article supplement (PMC5732714; doi:10.18632/oncotarget.21532), 2017-10-05
Supplement: oncotarget-08-103100-s001.pdf [file oncotarget-08-103100-s001.pdf]

# A framework for exploring associations between biomedical terms in PubMed

## SUPPLEMENTARY MATERIALS

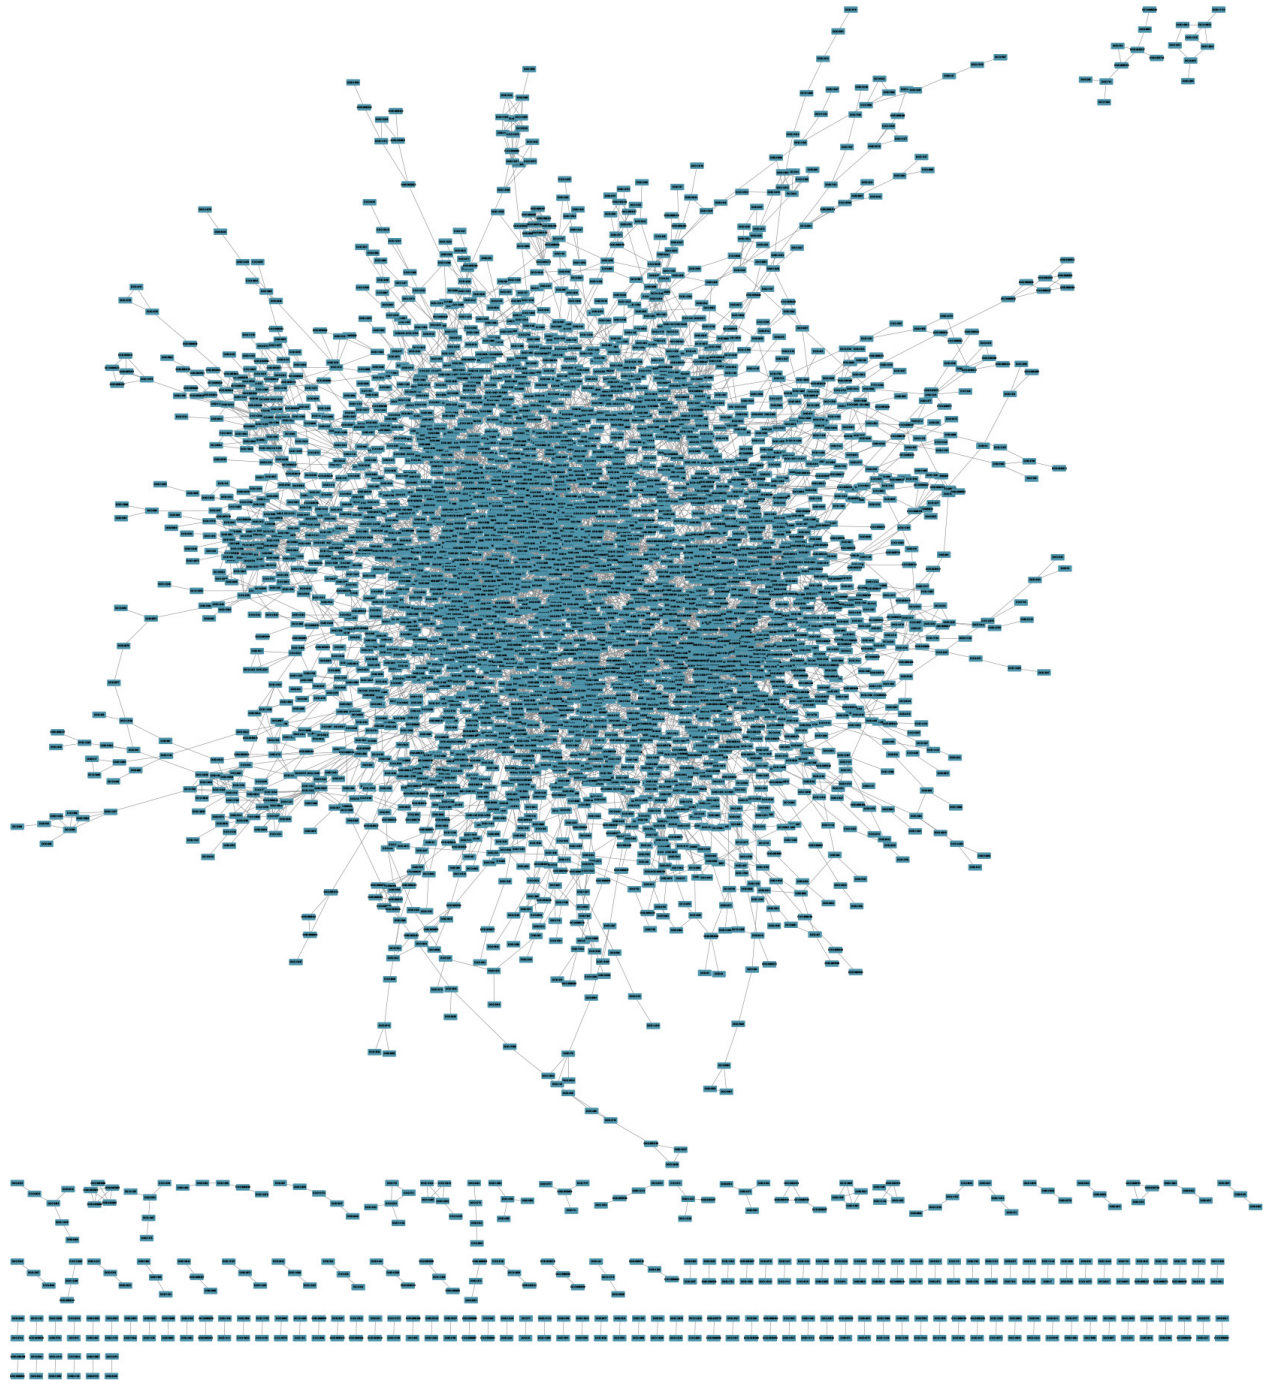

Supplementary Figure 1: The disease association network based on PubMed.
